# Supplementary material
Source: PubMed Central journal article supplement (PMC4369457)

## SUPPLEMENTAL INFORMATION

### Supplemental Figure Legends

**Fig S1. Growth curve of male C57BL/6 mice that have been treated with 7,8-DHF and high fat diet for 22 weeks (n=8), related to Fig 1.**

**Fig S2. 7,8-DHF stimulation does not inhibit adipogenesis, related to Fig 1.**

Adipogenesis of 3T3-L1 preadipocytes were induced by isobutylmethylxanthine-dexamethasone-insulin and various concentrations of 7,8-DHF as stated in the "Methods". Cellular lipid accumulation was determined by oil-red O staining and isopropanol extraction (n=3).

**Fig S3. Chronic consumption of 7,8-DHF does not alter the gastrointestinal absorption of lipid, related to Fig 3.**

Free fatty acid (A), triglyceride (B) and cholesterol (C) content of feces from female mice treated with 7,8-DHF for 20 weeks were determined (n=6-7).

**Fig S4. Chronic 7,8-DHF treatment activates hypothalamic TrkB receptors, related to Fig 5.**

Female wild-type and MTKO mice were fed with HFD and 7,8-DHF for 20 weeks. The hypothalamus was collected and phosphorylation of and expression of TrkB were then determined using immunoblotting.

**Fig S5. 7,8-DHF does not directly activate AMPK *in vitro*, related to Fig 7.**

AMPK $\alpha$  was immunoprecipitated from HEK293 cells and incubated with its specific activator A769662 (1 mM) or various concentrations of 7,8-DHF for 30 min. The kinase activity on SAMS peptide phosphorylation was then determined (\*\*\*:  $P < 0.05$ , one-way ANOVA,  $n = 3$ ).

## Supplemental Tables

**Table S1 Complete blood count of mice after chronic 78DHF treatment , related to Fig 1.**

|                                                  | H <sub>2</sub> O | 78DHF        | Normal value |
|--------------------------------------------------|------------------|--------------|--------------|
| White blood cell (10 <sup>6</sup> /ml)           | 3.89 ± 0.38      | 3.60 ± 0.36  | 1.8 - 10.7   |
| Neutrophil (10 <sup>6</sup> /ml)                 | 1.06 ± 0.13      | 0.84 ± 0.10  | 0.1 - 2.4    |
| (%)                                              | 25.76 ± 1.79     | 23.27 ± 1.07 |              |
| Lymphocyte (10 <sup>6</sup> /ml)                 | 2.54 ± 0.23      | 2.37 ± 0.21  | 0.9 - 9.3    |
| (%)                                              | 65.70 ± 1.75     | 66.37 ± 1.90 |              |
| Monocyte (10 <sup>6</sup> /ml)                   | 0.29 ± 0.04      | 0.29 ± 0.04  | 0 - 0.4      |
| (%)                                              | 7.20 ± 0.57      | 7.92 ± 0.55  |              |
| Eosinophil (10 <sup>6</sup> /ml)                 | 0.04 ± 0.02      | 0.07 ± 0.03  | 0 - 0.2      |
| (%)                                              | 0.92 ± 0.32      | 1.66 ± 0.65  |              |
| Basophil (10 <sup>6</sup> /ml)                   | 0.02 ± 0.01      | 0.03 ± 0.01  | 0 - 0.2      |
| (%)                                              | 0.42 ± 0.19      | 0.78 ± 0.30  |              |
| Hematocrit (%)                                   | 40.13 ± 0.72     | 44.36 ± 5.12 | 35.1 - 45.4  |
| Red blood cell (10 <sup>9</sup> /ml)             | 9.58 ± 0.13      | 10.63 ± 1.24 | 6.36 - 9.42  |
| Hemoglobin (g/dL)                                | 13.62 ± 0.27     | 13.05 ± 0.28 | 11.0 - 15.1  |
| Mean corpuscular volume (fL)                     | 41.89 ± 0.26     | 41.76 ± 0.18 | 45.4 - 60.3  |
| Mean corpuscular hemoglobin (pg)                 | 14.20 ± 0.14     | 13.13 ± 1.03 | 14.1 - 19.3  |
| Mean corpuscular hemoglobin concentration (g/dL) | 33.95 ± 0.23     | 31.4 ± 2.47  | 30.2 - 34.2  |
| Red cell distribution width (%)                  | 13.61 ± 0.12     | 14.06 ± 0.18 | 12.4 - 27.0  |
| Reticulocyte (10 <sup>6</sup> /ml)               | 31.60 ± 5.97     | 15.33 ± 4.02 |              |
| (%)                                              | 0.37 ± 0.07      | 0.16 ± 0.04  |              |
| Platelet (10 <sup>6</sup> /ml)                   | 846.50 ±         | 914.88 ±     | 592.0 -      |
|                                                  | 17.33            | 115.68       | 2972.0       |
| Mean platelet volume (fL)                        | 5.34 ± 0.03      | 5.49 ± 0.09  | 5.0 - 20.0   |
| Plate distribution width (%)                     | 42.64 ± 0.47     | 42.55 ± 0.53 | 39 - 49      |
| Plateletcrit (%)                                 | 0.45 ± 0.01      | 0.51 ± 0.07  |              |

Female C57/BL6 mice (n = 8) that have been fed with chow diet ± 78DHF (1.6 mg/L in drinking water) for 20 weeks.

**Table S2 Hepatic gene expression change after 7,8-DHF treatment, related to Fig 4.**

| Function                          | Gene     | NCBI Accession         | Gene expression (Arbitrary unit) |        |        |         |        |        |
|-----------------------------------|----------|------------------------|----------------------------------|--------|--------|---------|--------|--------|
|                                   |          |                        | H <sub>2</sub> O                 |        |        | 7,8-DHF |        |        |
| Proteolysis<br>/catabolism        | Usp18    | NM_011909              | 454.9                            | 420.7  | 484.5  | 250.9   | 239.1  | 210.7  |
|                                   | Sumo1    | NM_009460              | 1211.3                           | 930.9  | 1215.9 | 1973.6  | 1655.6 | 1478.4 |
|                                   | Cpb1     | NM_029706              | 150.7                            | 106.1  | 161.8  | 33.1    | 36.9   | 38.9   |
|                                   | Try4     | NM_011646              | 345.1                            | 263.9  | 270.3  | 152.3   | 139.4  | 120.1  |
|                                   | Try10    | NM_001038996           | 518.5                            | 494.9  | 491.0  | 145.2   | 167.1  | 117.2  |
|                                   | Cpa1     | NM_025350              | 1672.3                           | 1691.2 | 1601.8 | 136.9   | 127.4  | 129.2  |
|                                   | Ctrb1    | NM_025583              | 2081.6                           | 1997.4 | 2018.0 | 287.8   | 234.9  | 252.7  |
| Glucose/fatty acid<br>metabolism  | Lipo1    | NM_001013770           | 119.6                            | 100.0  | 162.1  | 230.8   | 245.2  | 224.9  |
| Detoxification                    | Sult3a1  | NM_020565              | 794.0                            | 1047.3 | 1173.9 | 2383.2  | 2126.6 | 1931.1 |
|                                   | Cyp2c54  | NM_206537              | 1176.4                           | 1470.1 | 1453.6 | 2585.1  | 2317.1 | 2315.5 |
|                                   | Cyp2c67  | NM_001024719           | 3670.3                           | 5652.2 | 5245.3 | 7673.1  | 6745.0 | 6499.4 |
|                                   | Cyp3a16  | NM_007820              | 1102.8                           | 1133.1 | 1221.8 | 2511.8  | 2433.6 | 2348.0 |
|                                   | Sult2a1  | NM_001111296           | 860.4                            | 1076.7 | 1459.5 | 914.1   | 737.1  | 631.1  |
|                                   | Sult2a3  | NM_001101586           | 375.4                            | 337.2  | 382.6  | 235.9   | 205.9  | 174.9  |
| DNA/RNA<br>processing             | Egr1     | NM_007913              | 91.1                             | 86.9   | 91.4   | 218.9   | 193.8  | 189.0  |
|                                   | Snora44  | NM_034050              | 279.7                            | 310.7  | 283.6  | 121.7   | 134.2  | 131.4  |
|                                   | Snora73b | NM_028513              | 641.6                            | 452.4  | 439.4  | 303.4   | 355.7  | 379.1  |
| Carrier protein                   | Fabp5    | NM_010634              | 183.1                            | 175.5  | 190.8  | 384.9   | 414.4  | 411.6  |
|                                   | Fabp7    | NM_021272              | 601.8                            | 627.0  | 637.8  | 1173.3  | 1171.7 | 1224.0 |
|                                   | Orm3     | NM_013623              | 461.3                            | 513.2  | 515.7  | 235.0   | 242.4  | 241.3  |
| Energy expenditure<br>/metabolism | ND6      | ENSMUST0000<br>0082419 | 564.2                            | 783.2  | 243.2  | 312.0   | 288.4  | 370.7  |
| Protein<br>synthesis/sorting      | Dnajc13  | NM_001163026           | 190.3                            | 126.1  | 175.4  | 296.1   | 287.7  | 243.0  |
|                                   | Uxt      | NM_013840              | 177.1                            | 64.8   | 148.1  | 83.0    | 116.7  | 138.0  |
| Hormone<br>/growth factor         | Bmp2     | NM_007553              | 244.8                            | 217.3  | 217.9  | 416.6   | 435.9  | 408.6  |
| Inflammation                      | Il1a     | NM_010554              | 127.7                            | 119.2  | 142.7  | 247.8   | 265.3  | 263.4  |
|                                   | Ifi44    | NM_133871              | 326.8                            | 265.0  | 280.4  | 588.8   | 568.5  | 526.4  |
|                                   | Gbp4     | NM_008620              | 121.6                            | 85.1   | 112.5  | 152.1   | 189.2  | 158.7  |
|                                   | Gbp9     | NM_172777              | 103.7                            | 78.1   | 90.1   | 158.3   | 179.8  | 160.6  |
| Unknown                           | Vmn1r125 | NM_001166740           | 41.7                             | 44.4   | 41.8   | 134.3   | 128.6  | 142.4  |
|                                   | Ly6a     | NM_010738              | 401.0                            | 456.8  | 502.7  | 946.8   | 952.3  | 899.2  |
|                                   | Slco1a1  | NM_013797              | 65.7                             | 59.0   | 76.6   | 161.3   | 176.0  | 158.3  |
|                                   | Olfr767  | NM_146318              | 83.4                             | 173.3  | 116.5  | 133.4   | 75.5   | 68.9   |
|                                   | Amy2a5   | NM_001042711           | 505.6                            | 562.2  | 623.8  | 187.7   | 183.1  | 195.4  |
|                                   | Amy2b    | NM_001190403           | 394.2                            | 390.5  | 440.5  | 121.8   | 129.4  | 150.6  |
|                                   | Dmbt1    | NM_007769              | 762.8                            | 774.6  | 852.2  | 37.1    | 41.4   | 34.3   |

Liver total RNA was isolated from female mice that have been treated with HFD  $\pm$  78DHF for 20 weeks. Expression of the genes was determined by microarray analysis. Only those genes with expression change  $>2$  fold and  $P < 0.05$  were presented.

**Table S3 Skeletal muscle gene expression change after 7,8-DHF treatment, related to Fig 4.**

| Function                             | Gene        | NCBI Accession | Gene expression (Arbitrary unit) |        |        |         |        |        |
|--------------------------------------|-------------|----------------|----------------------------------|--------|--------|---------|--------|--------|
|                                      |             |                | H <sub>2</sub> O                 |        |        | 7,8-DHF |        |        |
| Proteolysis<br>/catabolism           | Ublcp1      | NM_024475      | 310.4                            | 374.7  | 422.2  | 518.0   | 563.8  | 625.5  |
|                                      | Scpep1      | NM_029023      | 118.6                            | 100.2  | 112.5  | 202.6   | 193.1  | 204.7  |
|                                      | Ggh         | NM_010281      | 201.0                            | 161.4  | 209.5  | 313.5   | 316.0  | 323.7  |
|                                      | Rbbp6       | NM_011247      | 106.2                            | 110.1  | 146.7  | 232.2   | 196.4  | 202.7  |
|                                      | Htra4       | NM_001081187   | 121.7                            | 147.6  | 156.6  | 414.6   | 414.8  | 410.9  |
|                                      | Cdo1        | NM_033037      | 252.5                            | 261.7  | 274.7  | 705.5   | 750.2  | 690.2  |
|                                      | Cfd         | NM_0134598     | 268.0                            | 223.8  | 225.0  | 440.8   | 421.0  | 457.0  |
| Glucose/fatty acid<br>metabolism     | Mgat2       | NM_146035      | 174.0                            | 146.9  | 190.7  | 275.4   | 267.7  | 301.0  |
|                                      | Pde3b       | NM_011055      | 103.2                            | 70.7   | 105.5  | 198.7   | 187.7  | 192.4  |
|                                      | Pnpla3      | NM_054088      | 98.6                             | 97.4   | 98.5   | 199.6   | 215.7  | 190.4  |
|                                      | Scd1        | NM_009127      | 2849.5                           | 2701.0 | 2700.3 | 5540.5  | 5688.0 | 5906.6 |
|                                      | Scd2        | NM_009128      | 274.7                            | 223.3  | 227.2  | 549.5   | 569.7  | 590.1  |
|                                      | Acly        | NM_134037      | 108.5                            | 107.4  | 113.7  | 353.3   | 352.1  | 356.3  |
|                                      | Fasn        | NM_007988      | 184.6                            | 170.9  | 172.5  | 1120.6  | 1105.6 | 1149.4 |
|                                      | Elov16      | NM_130450      | 58.8                             | 57.0   | 52.9   | 240.9   | 234.0  | 248.7  |
|                                      | Plin1       | NM_175640      | 315.7                            | 309.5  | 310.8  | 607.6   | 598.4  | 638.1  |
|                                      | Thrsp       | NM_009381      | 121.6                            | 114.3  | 97.6   | 382.2   | 382.0  | 410.7  |
|                                      | Pepck1      | NM_011044      | 114.8                            | 118.3  | 134.2  | 241.5   | 253.6  | 245.3  |
|                                      | Acaca       | NM_133360      | 100.8                            | 143.0  | 123.2  | 344.1   | 356.4  | 377.3  |
|                                      | Slc25a1     | NM_153150      | 169.5                            | 148.8  | 174.7  | 518.2   | 531.4  | 511.2  |
|                                      | Slc25a10    | NM_013770      | 177.3                            | 107.1  | 103.8  | 256.4   | 237.3  | 250.2  |
|                                      | Fads1       | NM_146094      | 131.2                            | 132.7  | 131.3  | 262.7   | 266.1  | 254.6  |
|                                      | Tkt         | NM_009388      | 74.8                             | 64.9   | 77.5   | 203.9   | 182.7  | 186.3  |
|                                      | Insig1      | NM_153526      | 241.5                            | 196.6  | 225.7  | 483.1   | 451.9  | 456.3  |
| Nsdhl                                | NM_010941   | 180.6          | 190.0                            | 163.1  | 327.0  | 298.9   | 312.0  |        |
| Agpat2                               | NM_026212   | 167.2          | 159.0                            | 170.3  | 459.7  | 436.3   | 275.1  |        |
| Detoxification                       | Aldh1a7     | NM_011921      | 107.4                            | 88.7   | 111.9  | 195.0   | 183.2  | 203.4  |
|                                      | Cyp4f39     | NM_177307      | 138.3                            | 135.8  | 146.4  | 276.9   | 283.4  | 298.8  |
|                                      | Car5b       | NM_181315      | 124.7                            | 124.0  | 126.9  | 327.9   | 341.7  | 325.0  |
|                                      | Cyp3a41a    | NM_017396      | 207.5                            | 212.3  | 200.5  | 104.3   | 113.9  | 101.7  |
|                                      | Cyp3a41b    | NM_001105159   | 212.0                            | 216.2  | 200.2  | 102.3   | 119.5  | 104.7  |
| DNA/RNA<br>processing                | Rpp40       | NM_145938      | 105.9                            | 83.1   | 98.4   | 185.5   | 173.0  | 160.6  |
|                                      | Rpa3        | NM_026632      | 120.7                            | 87.9   | 107.7  | 188.4   | 212.0  | 186.5  |
|                                      | Ankrd1      | NR_030779      | 110.3                            | 130.1  | 126.5  | 164.3   | 145.9  | 162.0  |
|                                      | Mir297b     | NR_30474       | 191.5                            | 191.1  | 249.3  | 96.9    | 128.3  | 91.6   |
|                                      | Mir680-1    | NR_030447      | 439.9                            | 432.4  | 458.2  | 78.9    | 92.1   | 96.0   |
|                                      | Mir680-2    | NR_030448      | 853.8                            | 863.1  | 805.1  | 181.0   | 175.2  | 171.6  |
|                                      | Snord115    | AF357427       | 750.2                            | 735.8  | 725.9  | 83.6    | 105.0  | 78.4   |
|                                      | Snord116    | NR_002895      | 1089.4                           | 1014.8 | 1048.1 | 332.0   | 351.2  | 343.8  |
|                                      | Rnu2        | NR_004414      | 1746.7                           | 1606.3 | 1846.7 | 940.2   | 913.0  | 862.0  |
| Tsen15                               | NM_025677   | 213.4          | 163.3                            | 168.9  | 324.8  | 328.4   | 297.8  |        |
| Cell adhesion<br>/structural protein | Krt10       | NM_010660      | 56.6                             | 55.0   | 44.7   | 239.8   | 265.2  | 230.1  |
|                                      | Krt77       | NM_001003667   | 52.6                             | 49.3   | 53.6   | 190.2   | 184.9  | 190.5  |
|                                      | Myoc        | NM_010865      | 137.6                            | 118.9  | 131.6  | 285.8   | 328.8  | 297.6  |
|                                      | Chad        | NM_007689      | 70.8                             | 58.7   | 63.0   | 166.7   | 174.2  | 189.8  |
|                                      | Prg4        | NM_021400      | 117.4                            | 120.2  | 130.5  | 335.1   | 342.6  | 329.0  |
|                                      | Fmod        | NM_021355      | 251.2                            | 237.8  | 240.5  | 588.3   | 623.6  | 608.7  |
|                                      | Myo9a       | NM_173018      | 145.7                            | 146.2  | 147.9  | 267.6   | 237.4  | 235.3  |
|                                      | Lgals12     | NM_019516      | 77.4                             | 86.4   | 86.9   | 273.5   | 285.2  | 296.7  |
|                                      | Spr2a1      | NM_011468      | 214.1                            | 200.9  | 207.9  | 92.2    | 85.3   | 94.5   |
| Krtap16-8                            | ENSMUST0000 | 445.0          | 411.0                            | 418.3  | 111.7  | 109.6   | 121.0  |        |

|                                   |            |              |        |        |        |        |        |        |
|-----------------------------------|------------|--------------|--------|--------|--------|--------|--------|--------|
|                                   |            | 0074637      |        |        |        |        |        |        |
|                                   | Krtap20-2  | NM_001163615 | 220.6  | 219.3  | 219.1  | 48.6   | 55.5   | 53.0   |
|                                   | Krtap5-1   | NM_015808    | 222.5  | 224.4  | 188.2  | 107.9  | 115.7  | 122.6  |
|                                   | Krtap5-2   | NM_027844    | 287.1  | 296.8  | 243.9  | 167.8  | 141.5  | 153.8  |
| Carrier protein                   | Orm1       | NM_008768    | 131.0  | 120.2  | 128.6  | 260.9  | 289.6  | 299.7  |
|                                   | Hp         | NM_017370    | 317.8  | 281.6  | 279.3  | 159.5  | 151.1  | 166.3  |
| Energy expenditure<br>/metabolism | Mup1       | NM_001163011 | 1507.3 | 1398.3 | 1412.4 | 3158.0 | 3390.1 | 3037.1 |
|                                   | Ucp1       | NM_009463    | 23.7   | 25.5   | 26.0   | 254.3  | 265.1  | 245.4  |
|                                   | Prkar2b    | NM_011158    | 226.4  | 244.3  | 232.7  | 485.3  | 451.0  | 445.0  |
|                                   | ND6        | ENSMUST0000  | 1537.2 | 1353.1 | 1206.7 | 225.2  | 183.0  | 197.1  |
|                                   |            | 0082419      |        |        |        |        |        |        |
| Protein<br>synthesis/sorting      | Vps33b     | NM_178070    | 103.6  | 90.1   | 94.9   | 163.0  | 191.1  | 168.7  |
| Hormone<br>/growth factor         | Retn       | NM_022984    | 659.2  | 670.3  | 634.2  | 1344.9 | 1331.4 | 1291.1 |
|                                   | Bmp5       | NM_007555    | 107.3  | 104.9  | 102.0  | 287.6  | 245.0  | 263.9  |
| Cell cycle control                | Lgals3bp   | NM_011150    | 148.7  | 164.6  | 151.2  | 297.6  | 266.5  | 284.85 |
| Unknown                           | Tusc5      | NM-177709    | 150.4  | 134.4  | 131.6  | 266.7  | 282.6  | 261.2  |
|                                   | Lrrn4cl    | NM_001013019 | 113.5  | 85.0   | 98.3   | 187.8  | 182.7  | 173.2  |
|                                   | Cenpq      | NM_031863    | 125.5  | 87.4   | 105.1  | 186.1  | 203.6  | 179.8  |
|                                   | Sfxn1      | NM_027324    | 87.3   | 77.4   | 77.3   | 167.9  | 180.5  | 191.0  |
|                                   | Mup2       | NM_001045550 | 1562.0 | 1529.9 | 1451.8 | 3216.8 | 3502.6 | 3077.8 |
|                                   | Mup7       | NM_001134675 | 2111.1 | 2060.1 | 2021.1 | 4433.1 | 4676.8 | 4332.0 |
|                                   | Mup11      | NM_001164256 | 1810.8 | 1778.6 | 1752.3 | 3980.4 | 4149.8 | 3849.9 |
|                                   | Mup19      | NM_001135127 | 1553.0 | 1570.9 | 1495.1 | 3225.7 | 3366.4 | 3215.7 |
|                                   | Tmem45b    | NM_144936    | 250.3  | 261.6  | 250.4  | 719.8  | 748.7  | 704.5  |
|                                   | Ighv1-72   | ENSMUST0000  | 135.8  | 148.1  | 166.4  | 62.0   | 64.1   | 68.6   |
|                                   |            | 0103541      |        |        |        |        |        |        |
|                                   | Slfn3      | AF099974     | 1355.6 | 1295.1 | 1415.8 | 600.8  | 637.0  | 620.0  |
|                                   | Vlrg10     | NM_001166835 | 184.0  | 174.5  | 192.9  | 37.5   | 40.1   | 38.1   |
|                                   | Amy2a5     | NM_001042711 | 255.3  | 254.9  | 242.2  | 81.6   | 85.6   | 79.6   |
|                                   | Amy2b      | NM_001190403 | 187.6  | 168.5  | 175.6  | 59.0   | 64.9   | 60.3   |
|                                   | Nlrp4f     | ENSMUST0000  | 186.1  | 177.0  | 181.8  | 39.6   | 37.6   | 39.0   |
|                                   |            | 0081507      |        |        |        |        |        |        |
|                                   | Speer4d    | NM_025759    | 608.3  | 574.6  | 543.4  | 90.5   | 98.2   | 84.8   |
|                                   | Speer4e    | NM_001122661 | 593.3  | 575.3  | 581.0  | 89.1   | 88.4   | 86.3   |
|                                   | Speer8-ps1 | NR_001584    | 375.7  | 381.1  | 353.6  | 75.9   | 75.3   | 69.9   |
|                                   | Ssxb1      | NM_199064    | 86.5   | 85.6   | 92.5   | 47.6   | 43.6   | 34.0   |
|                                   | Slx11      | NM_029181    | 437.9  | 416.8  | 369.8  | 54.3   | 50.6   | 45.9   |
|                                   | Rex2       | NM_009051    | 404.7  | 397.3  | 342.6  | 98.9   | 112.7  | 101.6  |
|                                   | Zfp600     | NM_009051    | 129.5  | 122.0  | 110.3  | 30.2   | 25.5   | 33.3   |

Hind limb skeletal muscle (mixed muscle type) total RNA was isolated from female mice that have been treated with HFD  $\pm$  78DHF for 20 weeks. Expression of the genes was determined by microarray analysis. Only those genes with expression change  $>2$  fold and  $P < 0.05$  were presented.

Figure S1

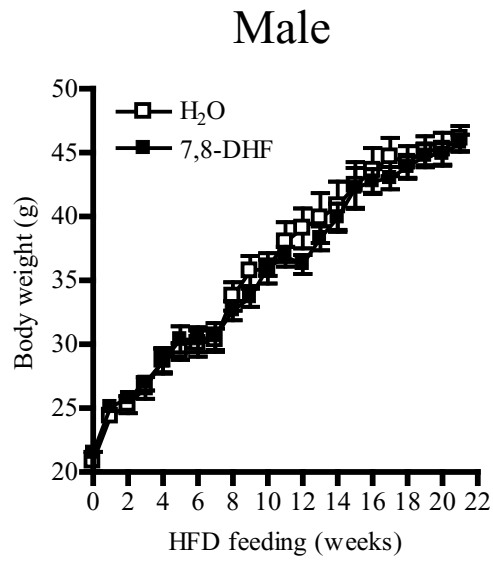

**Figure S2**

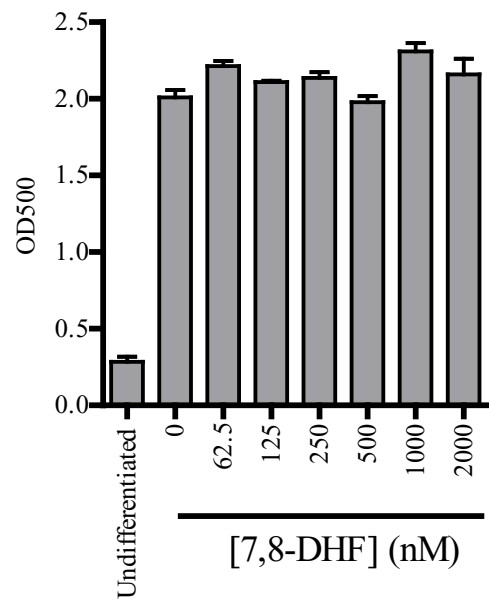



**Figure S3**

**A**

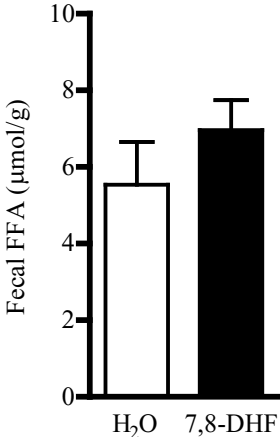

**B**

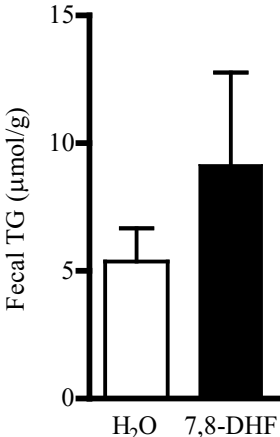

**C**

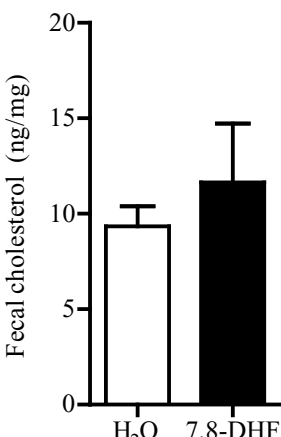

**Figure S4**

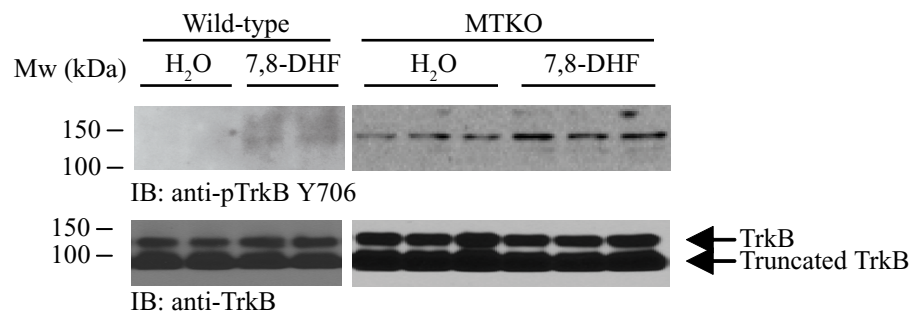

**Figure S5**

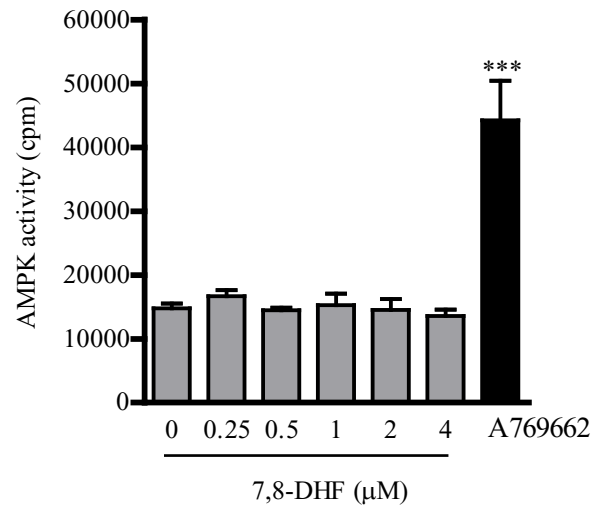

Supplement: NIHMS664548-supplement-Supplement.pdf [file NIHMS664548-supplement-Supplement.pdf]
